# Supplementary material for: Exploiting thiolate/disulfide redox couples toward large-scale electrochemical carbon dioxide capture and release
Source: Royal Society of Chemistry journal article supplement (doi:10.1039/d4ee04739g), 2025-01-01
Supplement: d4ee04739g1.pdf [file d4ee04739g1.pdf]

## Supplementary Information

### **Exploiting thiolate/disulfide redox couples toward large-scale electrochemical carbon dioxide capture and release**

Xiaoxin Li<sup>1</sup>, Chao Deng<sup>1</sup>, Rong Chen<sup>1</sup>, Xu Li<sup>1</sup>, Furong Xie<sup>1</sup>, Zinan Wu<sup>1</sup>, Yu Xie<sup>2</sup>,  
Song Wang<sup>3</sup>, Guo-Ming Weng<sup>1,\*</sup>

<sup>1</sup> Shanghai Key Laboratory of Hydrogen Science & Center of Hydrogen Science,  
School of Materials Science and Engineering, Shanghai Jiao Tong University, Shanghai  
200240 P. R. China

<sup>2</sup> Key Laboratory of Material Simulation Methods & Software of Ministry of Education,  
Key Laboratory of Physics and Technology for Advanced Batteries of Ministry of  
Education, College of Physics, Jilin University, Changchun 130012 P. R. China

<sup>3</sup> Institute of Theoretical Chemistry, College of Chemistry, Jilin University, Changchun  
130023 P. R. China

\* Email: [guoming.weng@sjtu.edu.cn](mailto:guoming.weng@sjtu.edu.cn)

**Table S1. Solubility of reported redox-active molecules for ECCR.**

| molecule | Structure                                                                           | Solubility (M) | Solvent               | Ref.      |
|----------|-------------------------------------------------------------------------------------|----------------|-----------------------|-----------|
| 1,4-NQ   | 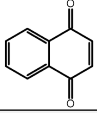   | 0.56           | [emim][tcm]           | 1         |
| LQ       |    | Completely     | Diglyme               | 2         |
| AzPy     |    | 0.59 M         | DMSO with 0.5M LiTFSI | 3         |
| BDS      |    | 2 M            | DMF                   | 4         |
| FDS      |    | Completely     | DMF                   | This work |
| PDS      |   | 5.0 M          | DMF                   | This work |
| PDS      |  | 3.5 M          | DMF with 0.5 M NaTFSI | This work |

**Notes:**

LQ and FDS are liquid. Therefore, they are miscible with aprotic solvent.

**Abbreviations of molecule in Table S1.**

**1,4-NQ:** 1,4-naphthoquinone

**[emim][tcm]:** 1-ethyl-3-methylimidazolium tricyanomethanide

**LQ:** 2,3-Di-(2-(2-methoxyethoxy)ethoxy)-1,4-naphthoquinone

**AzPy:** Azopyridine

**DMSO:** Dimethyl sulfoxide

**LiTFSI:** Lithium bis(trifluoromethanesulphonyl)imide

**BDS:** Benzyl disulfide

**FDS:** 4-fluorophenyl disulfide

**DMF:** N, N-dimethyl formamide

**PDS:** Phenyl disulfide

**NaTFSI:** Sodium bis(trifluoromethanesulphonyl)imide

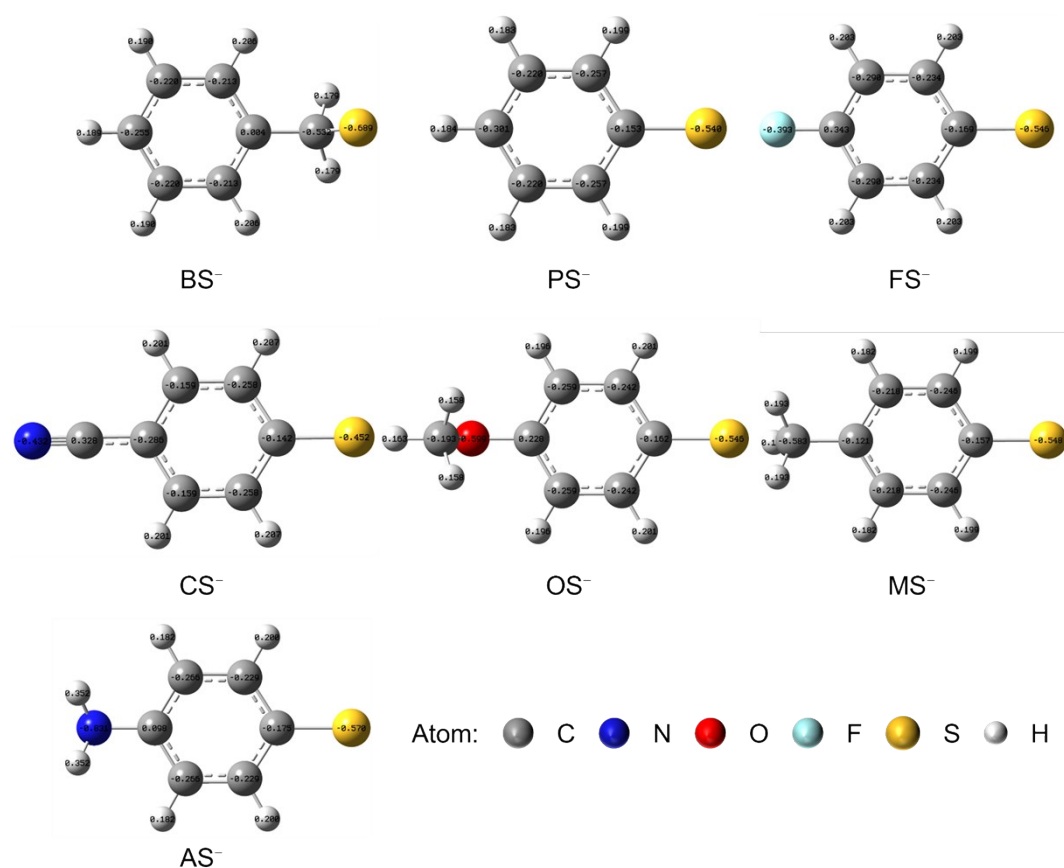

**Figure S1. The Natural Population Analysis (NPA) charges.** The NPA charges of different thiolate anion, obtained from Nature Bond Orbitals (NBO). **BS<sup>-</sup>**: benzyl thiolate, **PS<sup>-</sup>**: phenyl disulfide, **OS<sup>-</sup>**: 4-methoxyphenyl thiolate, **MS<sup>-</sup>**: 4-methylphenyl thiolate, **AS<sup>-</sup>**: 4-aminodiphenyl thiolate, **FS<sup>-</sup>**: 4-fluorophenyl thiolate, **CS<sup>-</sup>**: 4-cyanophenyl thiolate.

The NPA charges of S atom in **PS<sup>-</sup>** are -0.540, which is less than that of **BS<sup>-</sup>** (-0.689). After substituting the H atom by electron-donating groups, the NPA charges of S atom increase. While the H is substituted by electron-withdrawing group, the NPA charges of S atom decrease.

**Table S2. Summary of NPA charges of S atom in Figure S1 for different thiolate anions.**

| S atom in thiolate anion | NPA charges |
|--------------------------|-------------|
| <b>BS<sup>-</sup></b>    | -0.689      |
| <b>PS<sup>-</sup></b>    | -0.540      |
| <b>MS<sup>-</sup></b>    | -0.548      |
| <b>OS<sup>-</sup></b>    | -0.546      |
| <b>AS<sup>-</sup></b>    | -0.570      |
| <b>FS<sup>-</sup></b>    | -0.546      |
| <b>CS<sup>-</sup></b>    | -0.452      |

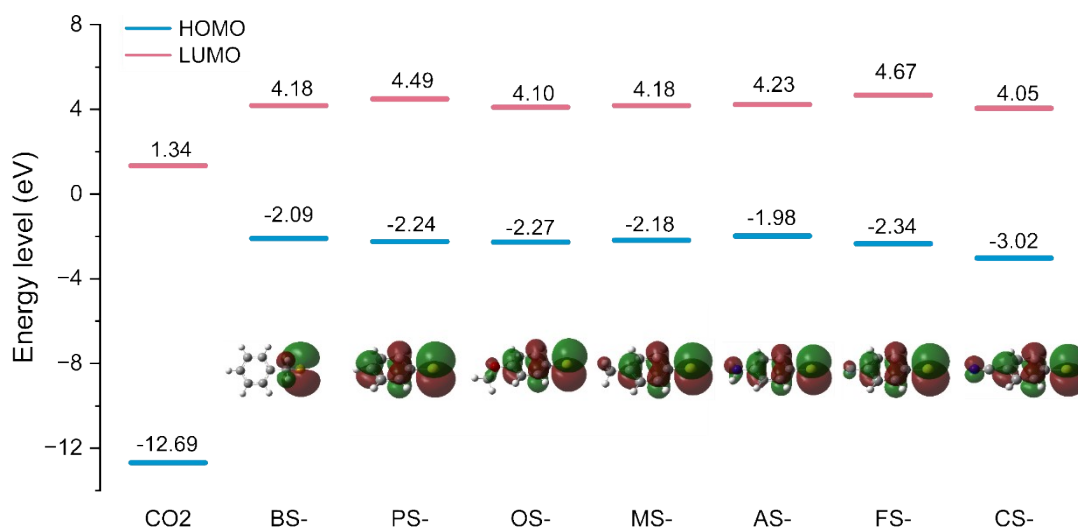

**Figure S2. HOMO and LUMO energy level diagram.** Visualized HOMO and LUMO distributions and corresponding energy values of CO<sub>2</sub> and different thiolate anions. The LUMO energy of CO<sub>2</sub> here is positive, while the widely acceptance value should be negative.<sup>5</sup> When B3LYP/6-311+G(d, p) was used to perform the calculation, the negative energy of CO<sub>2</sub> LUMO (-0.54 eV) was obtained. Although the B3LYP functional is suitable for small molecule CO<sub>2</sub>, the  $\omega$ B97XD functional with van der Waals corrections is more suitable for investigated disulfides with  $\pi$  system. Therefore, we proceeded all calculation by using  $\omega$ B97XD functional, in order to maintain consistency in the used functional.

**Table S3. Summary of HOMO-LUMO gap between thiolate anions and CO<sub>2</sub>, as well as the binding energy of corresponding CO<sub>2</sub> adducts.**

| Thiolate anion  | HOMO-LUMO gap (eV) | Binding energy to CO <sub>2</sub> ( $\Delta H$ , kJ mol <sup>-1</sup> ) |
|-----------------|--------------------|-------------------------------------------------------------------------|
| BS <sup>-</sup> | 3.43               | -71.09                                                                  |
| PS <sup>-</sup> | 3.58               | -27.62                                                                  |
| MS <sup>-</sup> | 3.52               | -29.26                                                                  |
| OS <sup>-</sup> | 3.61               | -35.94                                                                  |
| AS <sup>-</sup> | 3.32               | -25.27                                                                  |
| FS <sup>-</sup> | 3.68               | -20.58                                                                  |
| CS <sup>-</sup> | 4.36               | -17.26                                                                  |

Note: more DFT calculation details are shown in **Supplementary Note 2**.

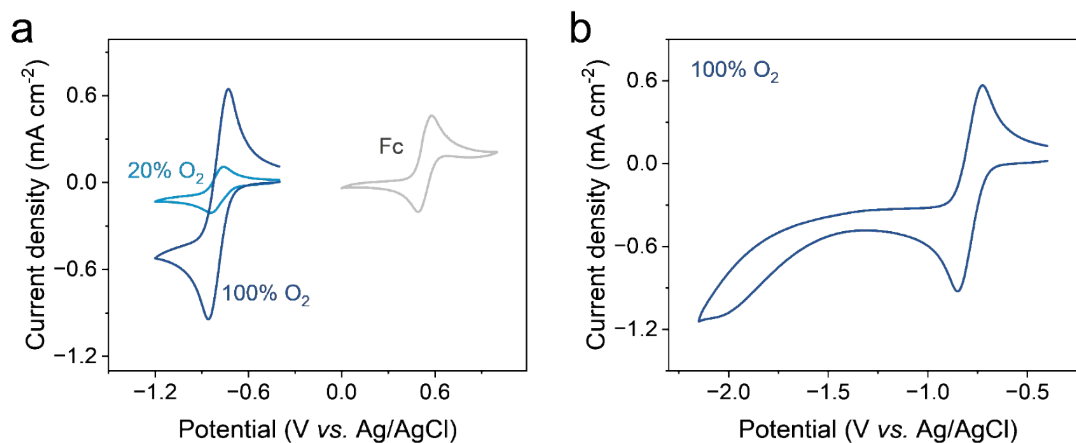

**Figure S3.** (a) CV of 20%, 100% O<sub>2</sub> (pale blue, dark blue curves) and 5 mM ferrocene (gray curve) at a measuring window of -0.4 ~ -1.2 V and 1 ~ 0 V, respectively. (b) CV of 100% O<sub>2</sub> at a measuring window of -0.4 ~ -2.15 V. The cyclic voltammograms were collected in DMF with 0.1 M TBAP as the supporting electrolyte at a scan rate of 10 mV s<sup>-1</sup>. The O<sub>2</sub> was firstly reduced to O<sub>2</sub><sup>•-</sup> at around -0.8 V, and the O<sub>2</sub><sup>•-</sup> was further reduced to O<sub>2</sub><sup>2-</sup> when the applied potential increase to -2.0 V.<sup>6</sup>

**Table S4. Half wave potential ( $E_{1/2}$ ) of O<sub>2</sub>/O<sub>2</sub><sup>•-</sup> versus different reference electrodes.**

| Reference \ Species | $E_{1/2}$ (V) for 20% O <sub>2</sub> | $E_{1/2}$ (V) for 100% O <sub>2</sub> | $E_{1/2}$ (V) for ferrocene |
|---------------------|--------------------------------------|---------------------------------------|-----------------------------|
| Ag/AgCl             | -0.800                               | -0.793                                | 0.535                       |
| SCE                 | -0.844                               | -0.837                                | 0.491                       |
| Fc <sup>+</sup> /Fc | -1.335                               | -1.328                                | 0                           |

Notes: For the readers' information, a derivate of naphthoquinone with liquid phase reported by Diederichsen et al. exhibits a more positive reduction potential than that of O<sub>2</sub>/O<sub>2</sub><sup>•-</sup> (~ -1.2 V vs. Fc<sup>+</sup>/Fc) in aprotic solution under room temperature.<sup>2</sup>

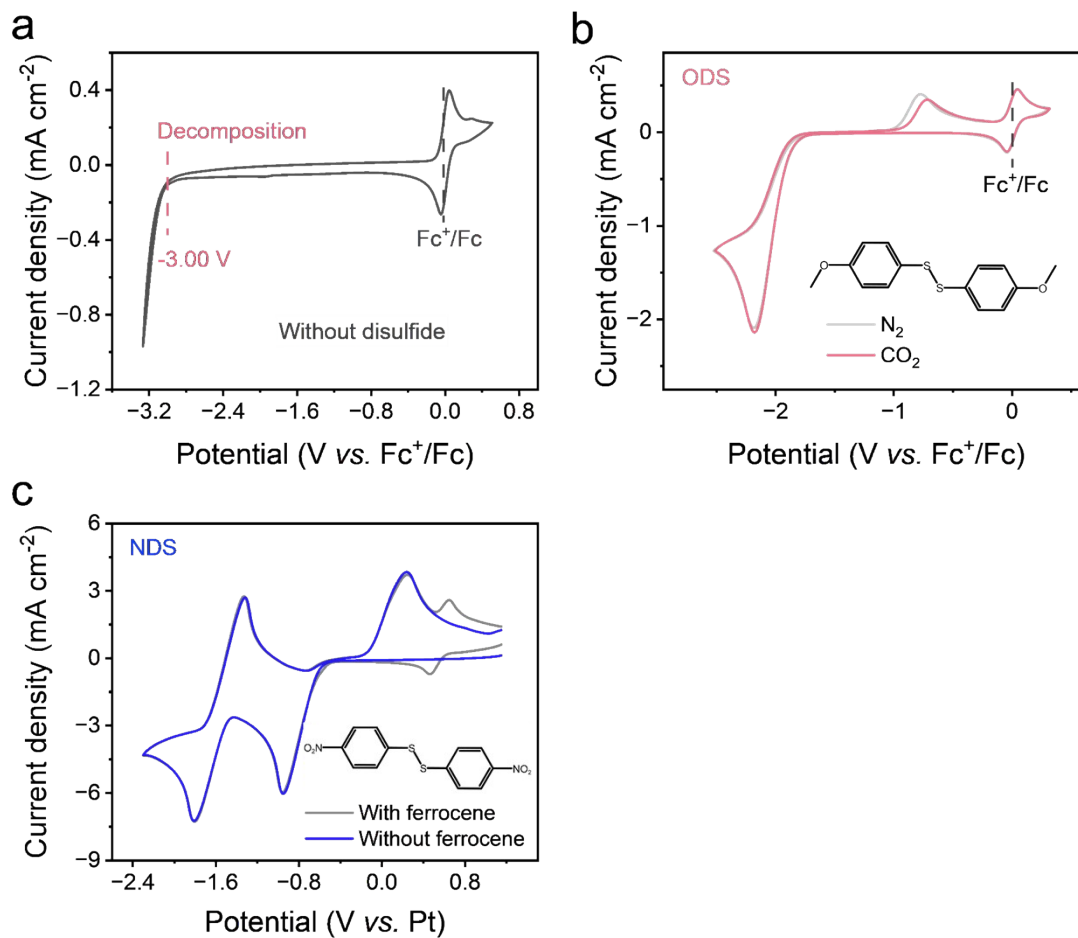

**Figure S4.** (a) cyclic voltammogram for electrochemical stability of electrolyte. The CV was performed under  $\text{N}_2$  without disulfide in the electrolyte. The electrolyte started to decompose at around -3.00 V. (b) Cyclic voltammograms of 20 mM 4-methoxyphenyl disulfide (ODS) under  $\text{N}_2/\text{CO}_2$  with 5 mM ferrocene at scan rate of  $10 \text{ mV s}^{-1}$  (c) Cyclic voltammograms of 20 mM 4-nitrophenyl disulfide (NDS) under  $\text{N}_2$  with/without 5 mM ferrocene at scan rate of  $100 \text{ mV s}^{-1}$ .

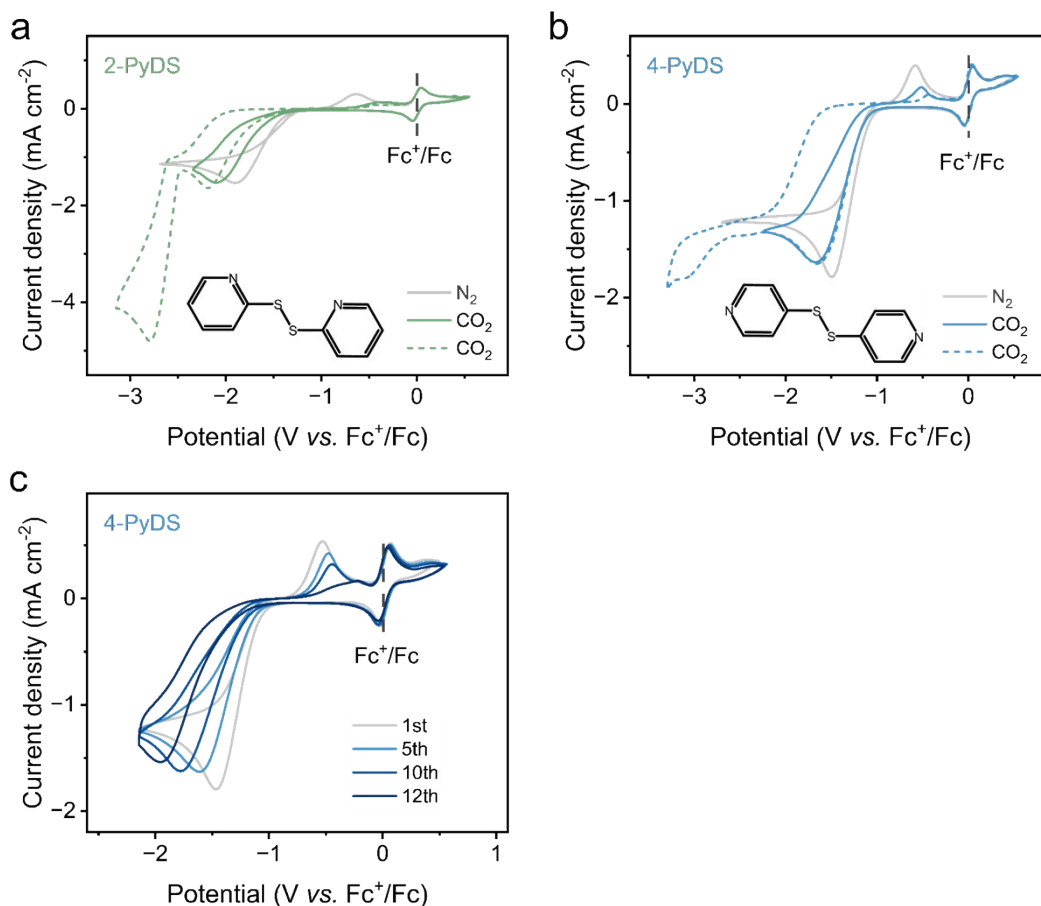

**Figure S5. Cyclic voltammetry of 2-PyDS and 4-PyDS.** (a) and (b) are the Cyclic voltammograms of 20mM 2,2'-dipyridinyl disulfide (2-PyDS) and 4,4'-dipyridinyl disulfide (4-PyDS) in DMF with 0.1 M TBAP, respectively, under N<sub>2</sub> and CO<sub>2</sub>. As shown by dash line, there is one more reduction peak when the scan window was extended. This should result from the reduction of pyridine-N after forming CO<sub>2</sub> adducts. (c) CV curves of 4-PyDS at different cycle number under N<sub>2</sub> atmosphere. The CV curve can't overlap with each other, which should result from the unstability of dipyridine disulfide.<sup>7, 8</sup>

**Table S5. Peak potential of 2-PyDS and 4-PyDS.**

| Molecule                               | Condition       | E <sub>pc</sub><br>(V vs. Fc <sup>+/Fc</sup> ) | E <sub>pa</sub><br>(V vs. Fc <sup>+/Fc</sup> ) | ΔE <sub>pa</sub> =E <sub>pa</sub> (CO <sub>2</sub> ) -<br>E <sub>pa</sub> (N <sub>2</sub> ) |
|----------------------------------------|-----------------|------------------------------------------------|------------------------------------------------|---------------------------------------------------------------------------------------------|
| 2,2'-dipyridinyl<br>disulfide (2-PyDS) | N <sub>2</sub>  | -1.905                                         | -0.634                                         | 0.283                                                                                       |
|                                        | CO <sub>2</sub> | -2.096                                         | -0.351                                         |                                                                                             |
| 4,4'-dipyridinyl<br>disulfide (4-PyDS) | N <sub>2</sub>  | -1.496                                         | -0.582                                         | 0.067                                                                                       |
|                                        | CO <sub>2</sub> | -1.676                                         | -0.515                                         |                                                                                             |

**Table S6. Peak potential,  $\Delta E_{\text{cell}}$  and  $\Delta G$  for PDS, FDS and CDS with either 0.1 M LiTFSI or NaTFSI as the supporting electrolyte.**

| Molecule | Condition                          | $E_{\text{pc}}$<br>(V) | $E_{\text{pa}}$<br>(V) | $\Delta E_{\text{cell}}$<br>(V) | $\Delta G$<br>$\text{kJ mol}^{-1} \text{CO}_2$ | $\Delta E_{\text{pa}}$<br>(V) |
|----------|------------------------------------|------------------------|------------------------|---------------------------------|------------------------------------------------|-------------------------------|
| PDS      | Li <sup>+</sup> (N <sub>2</sub> )  | -2.140                 | -0.742                 | -                               | -                                              | 0.428                         |
|          | Li <sup>+</sup> (CO <sub>2</sub> ) | -2.141                 | -0.314                 | 1.827                           | 176                                            |                               |
|          | Na <sup>+</sup> (N <sub>2</sub> )  | -2.139                 | -0.732                 | -                               | -                                              | 0.282                         |
|          | Na <sup>+</sup> (CO <sub>2</sub> ) | -2.125                 | -0.450                 | 1.675                           | 162                                            |                               |
| FDS      | Li <sup>+</sup> (N <sub>2</sub> )  | -2.002                 | -0.725                 | -                               | -                                              | 0.389                         |
|          | Li <sup>+</sup> (CO <sub>2</sub> ) | -2.037                 | -0.336                 | 1.701                           | 164                                            |                               |
|          | Na <sup>+</sup> (N <sub>2</sub> )  | -2.002                 | -0.718                 | -                               | -                                              | 0.209                         |
|          | Na <sup>+</sup> (CO <sub>2</sub> ) | -2.016                 | -0.509                 | 1.507                           | 145                                            |                               |
| CDS      | Li <sup>+</sup> (N <sub>2</sub> )  | -1.294                 | -0.668                 | -                               | -                                              | 0.022                         |
|          | Li <sup>+</sup> (CO <sub>2</sub> ) | -1.314                 | -0.646                 | 0.668                           | 64                                             |                               |
|          | Na <sup>+</sup> (N <sub>2</sub> )  | -1.274                 | -0.695                 | -                               | -                                              | 0.022                         |
|          | Na <sup>+</sup> (CO <sub>2</sub> ) | -1.291                 | -0.673                 | 0.618                           | 60                                             |                               |

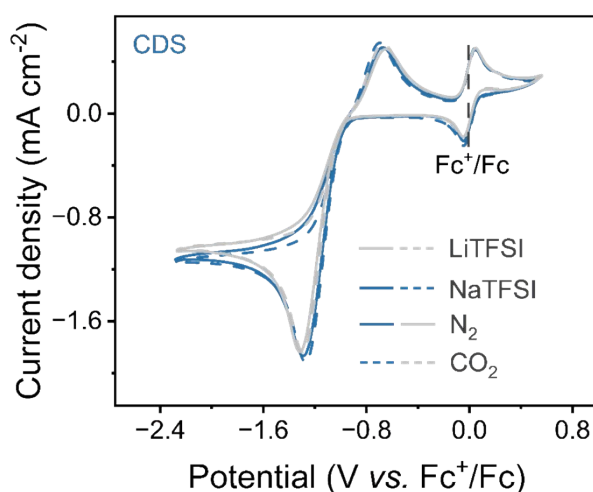

**Figure S6.** Cyclic voltammograms of 20 mM CDS with either 0.1 M LiTFSI (gray curves) or 0.1 M NaTFSI (dark blue curves) as the supporting electrolyte in DMF, under the atmosphere of N<sub>2</sub> (solid curves) and CO<sub>2</sub> (dash curves).



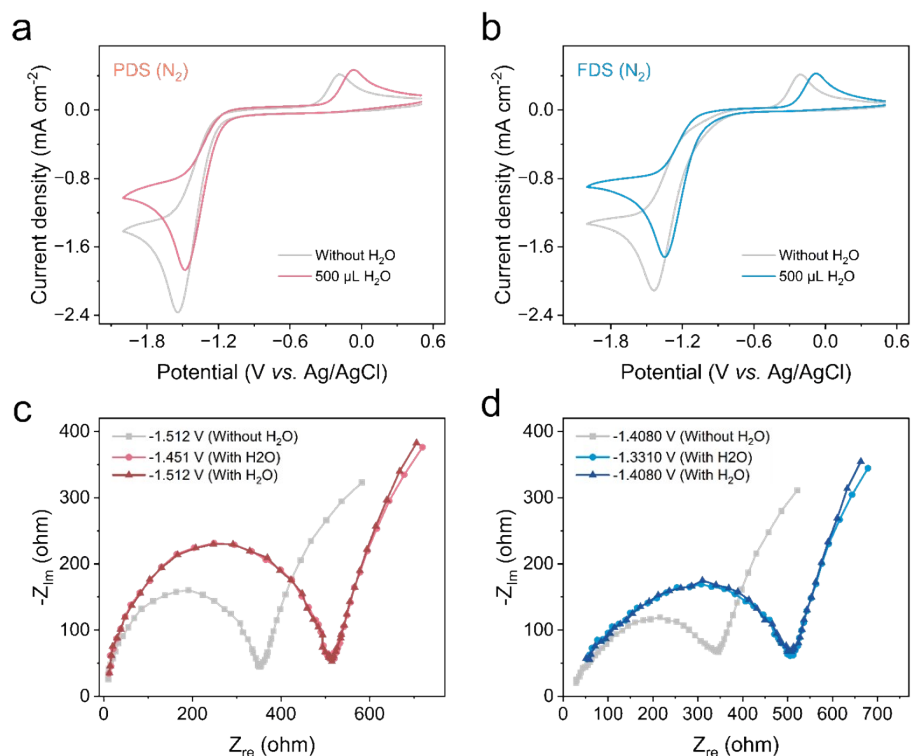

**Figure S7. Cyclic voltammograms and electrochemical impedance spectroscopy (EIS) for the systems with PDS and FDS.** CV of 20 mM PDS (a) and FDS (b) in 0.1 TBAP with/without H<sub>2</sub>O under N<sub>2</sub>. (c) and (d) are the EIS spectrum of the systems with PDS and FDS, respectively, with/without H<sub>2</sub>O under different applied potential. Experimental details: working electrode, glass carbon; Counter electrode, Pt foil; reference, Ag/AgCl. Same rate for CV, 10 mV s<sup>-1</sup>. Frequency range for EIS, 100 Hz to 1 MHz. The larger radius of EIS spectra, the larger charge transfer resistance. Note that the applied potentials for EIS were calculated by plus 30 mV with E<sub>pc</sub>, and the E<sub>pc</sub> was obtained from the corresponding CV curve.

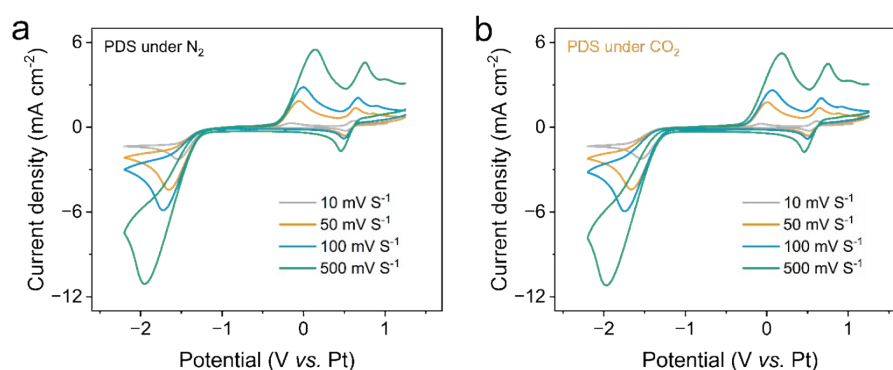

**Figure S8. Cyclic voltammograms of the system with PDS at different scan rates.** (a) and (b) are CV curves of 20 mM PDS under N<sub>2</sub> and CO<sub>2</sub>, respectively. Information about the colorful labels and curves: 10 mV s<sup>-1</sup> (gray), 50 mV s<sup>-1</sup> (orange), 100 mV s<sup>-1</sup> (blue) and 500 mV s<sup>-1</sup> (green).

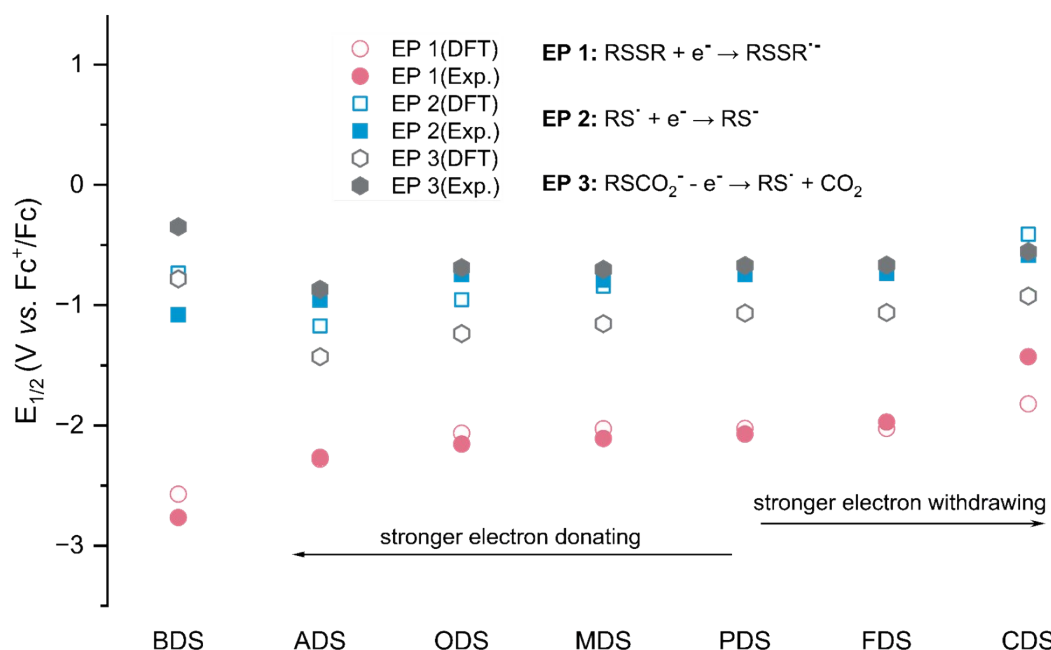

**Figure S9. Comparison of the standard redox potential from DFT calculation and experiment results for different disulfides.** The red circle, blue square and gray hexagon symbols represent the potential of electrochemical processes EP 1, EP 2 and EP 3, respectively, corresponding to **Figure 4** in main text. The filled and unfilled symbols represent the potential from experimental results and DFT calculation, respectively.

**Table S7. Summary and comparison of the standard redox potential from DFT calculation and experiment results for different disulfides.**

| disulfide  | EP 1 (V vs. Fc <sup>+</sup> /Fc) |        | EP 2 (V vs. Fc <sup>+</sup> /Fc) |        | EP 3 (V vs. Fc <sup>+</sup> /Fc) |        |
|------------|----------------------------------|--------|----------------------------------|--------|----------------------------------|--------|
|            | DFT                              | Exp.   | DFT                              | Exp.   | DFT                              | Exp.   |
| <b>BDS</b> | -2.571                           | -2.765 | -0.732                           | -1.078 | -0.781                           | -0.348 |
| <b>PDS</b> | -2.025                           | -2.072 | -0.728                           | -0.743 | -1.066                           | -0.670 |
| <b>MDS</b> | -2.027                           | -2.109 | -0.841                           | -0.79  | -1.154                           | -0.702 |
| <b>ODS</b> | -2.064                           | -2.155 | -0.954                           | -0.744 | -1.236                           | -0.688 |
| <b>ADS</b> | -2.280                           | -2.265 | -1.172                           | -0.958 | -1.428                           | -0.868 |
| <b>FDS</b> | -2.025                           | -1.971 | -0.718                           | -0.736 | -1.061                           | -0.666 |
| <b>CDS</b> | -1.821                           | -1.428 | -0.410                           | -0.583 | -0.924                           | -0.554 |

Note:

- (1) The details of DFT calculation method were shown in **supplementary note 2**.
- (2) The experimental redox potentials of the above disulfides were estimated by the equation  $E_{1/2} = E_{pc} + 30 \text{ mV} = E_{pa} - 30 \text{ mV}$
- (3) The redox potentials of EP 1 and EP 2 processes obtained from DFT calculation match well the experimental results, while the redox potentials of EP 3 process have some deviation.

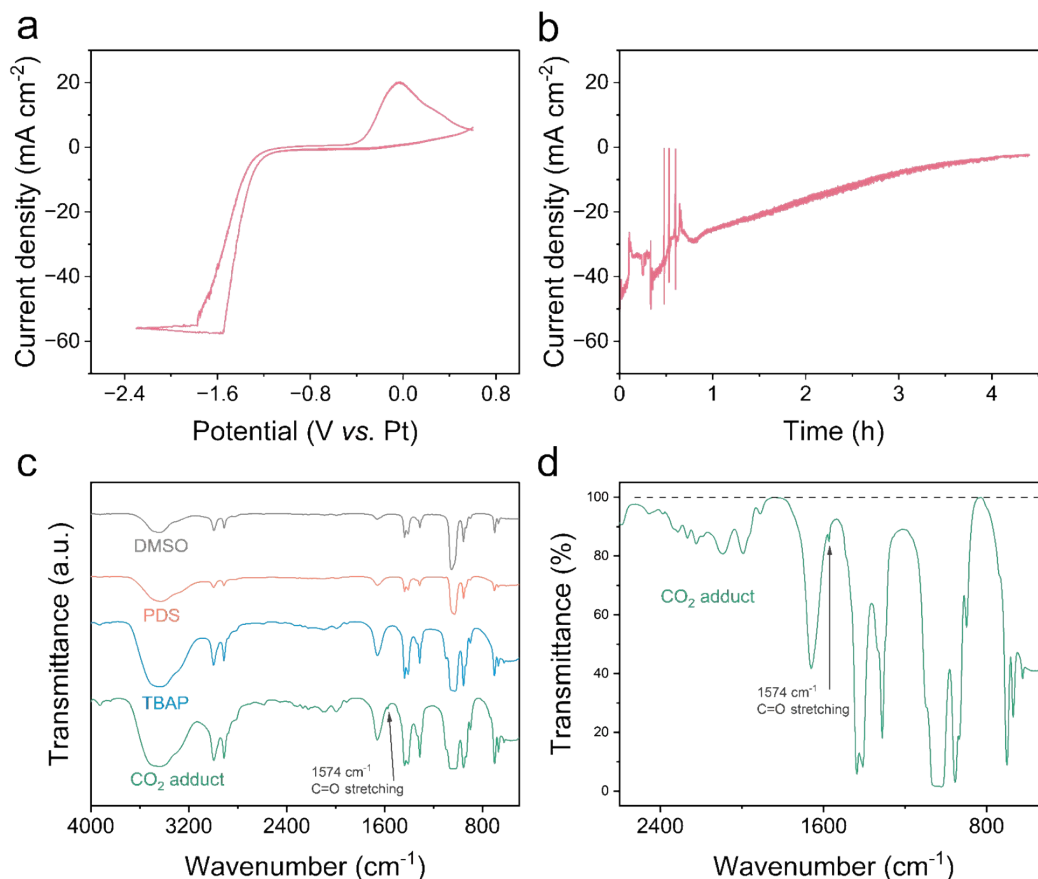

**Figure S10. Identification of CO<sub>2</sub> adducts with Fourier transform infrared (FTIR) Spectrometry.** (a) CV curve of 20 mM PDS in DMSO with 0.1M TBAP by using a H-cell with continuous CO<sub>2</sub> bubbling (10 mL min<sup>-1</sup>). (b) Chronoamperometry curve (bulk electrolysis) at -1.8 V vs. Pt with continuous CO<sub>2</sub> bubbling at a flow rate of 10 mL min<sup>-1</sup>. The fluctuation of i-t curve should result from the bubbling of CO<sub>2</sub>. The color change is negligible and thus can't be observed, since the conjugated system of PS<sup>-</sup> or PSCO<sub>2</sub><sup>-</sup> is too small. (c) FTIR spectra for DMSO and solution of PDS, TBAP and CO<sub>2</sub> adducts (PSCO<sub>2</sub><sup>-</sup>) in DMSO. (d) The enlarged FTIR spectra of CO<sub>2</sub> adducts are to show that the C=O bond stretching vibration should not result from signal noise, because the signal noise can not reach about 85% transmittance. Note: The PSCO<sub>2</sub><sup>-</sup> in catholyte was collected from bulk electrolysis in a H-Cell (details in **Electrochemical experiments** of main text). Then the catholyte was dropped on KBr single crystal wafer with a thickness of 1 mm, and formed a liquid layer between two KBr slices. After capturing CO<sub>2</sub>, new absorption peak at 1574 cm<sup>-1</sup> appears, which could be assigned to C=O bond stretching vibration. Thus, the FTIR results confirmed the formation of CO<sub>2</sub> adducts, i.e., PSCO<sub>2</sub><sup>-</sup>.<sup>4,9</sup>

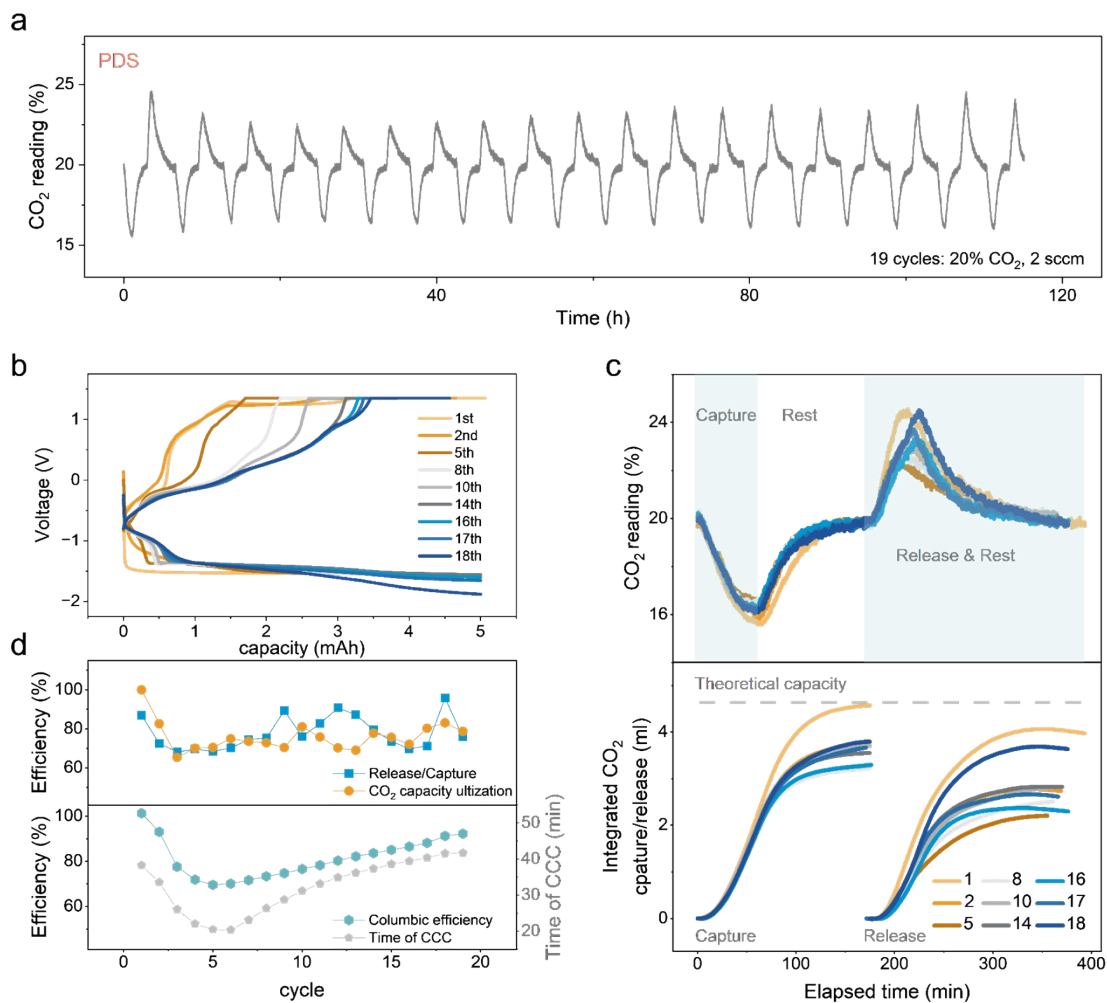

**Figure S11. Performance of CO<sub>2</sub> capture and release cycles in a flow cell with PDS as the sorbent.**

**(a)** CO<sub>2</sub> reading curve of 19 repeated capture and release cycles at the exit of PDS tank.

**(b)** The selected corresponding voltage-capacity curves.

**(c)** The top panel, CO<sub>2</sub> reading for selected capture and release cycles. The bottom panel, cumulative amount of captured and released CO<sub>2</sub> in selected cycles. For capture (discharge) process, the DS was reduced to react with CO<sub>2</sub> at 5 mA for 60 min and then rested for 115 min. For release (charge) process, CO<sub>2</sub> adducts were oxidized to release CO<sub>2</sub> and regenerate DS, at 5 mA to 1.35 V followed by a 100 min constant voltage of 1.35 V hold and a 60 min rest.

**(d)** Release/capture efficiency (blue square), CO<sub>2</sub> capacity utilization (yellow circle), columbic efficiency (green hexagon), and time of constant current charge (CCC) (gray pentagon) for 19 cycles shown in **(a)**. The CO<sub>2</sub> capacity utilization efficiency was about 100% in the first cycle, and then gradually decrease and hover around 75%. The release/capacity efficiency showed a trend of decrease firstly and then increase in cycles as columbic efficiency, and have an average efficiency of ~78%. In the 18th cycle, the release/capacity efficiency and columbic efficiency returned to ~96% and ~91%, respectively, suggesting the good stability and reversibility of the PDS in CO<sub>2</sub> capture-release cycle.

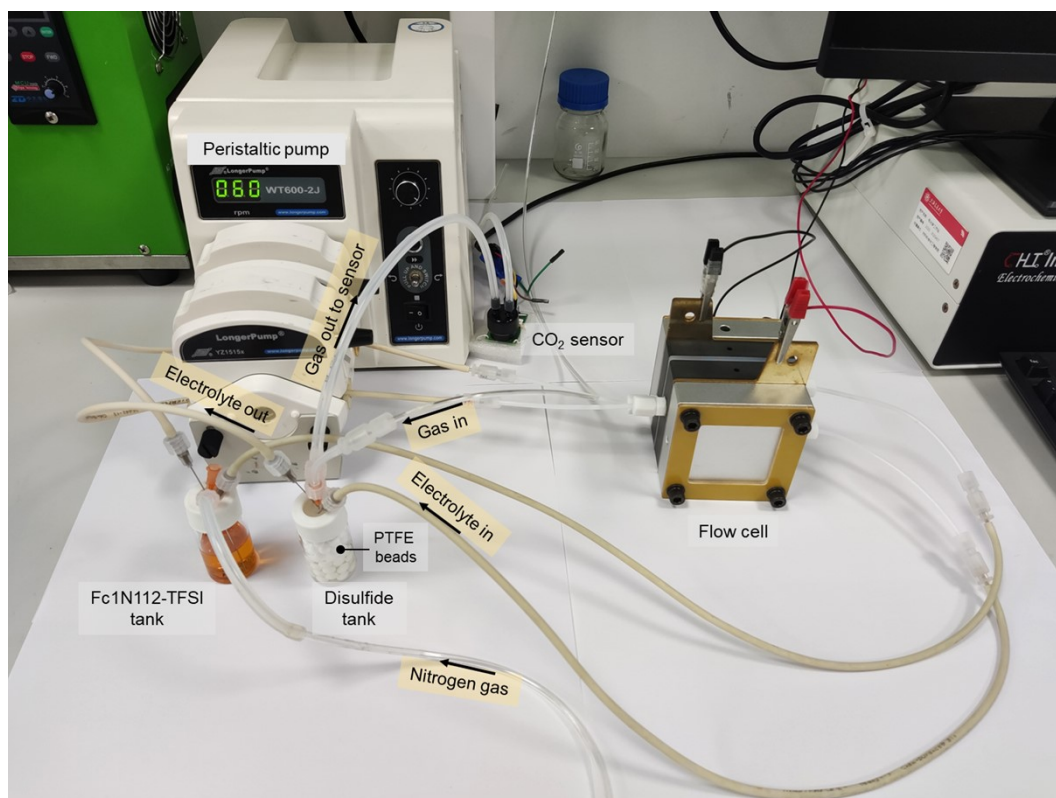

**Figure S12. Flow system for CO<sub>2</sub> capture and release.** The main part of the CO<sub>2</sub> capture and release system are shown in this photo. Noted that the durable peristaltic pump tubes (Chem-Duranc; Masterflex) and PTFE tubes ( $\text{\O} = 3 \text{ mm}$ ) were used in our system, to avoid the undesirable corrosion of tube by organic electrolyte.

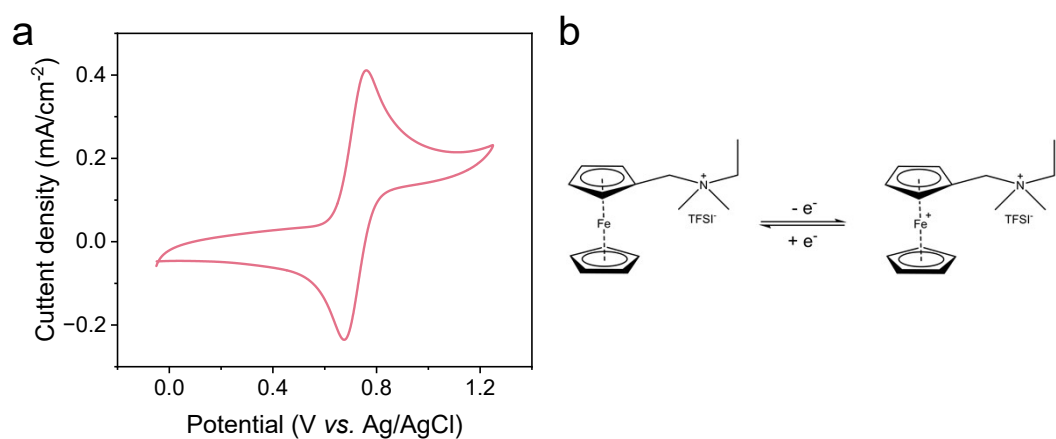

**Figure S13. Redox-active substance as the counter electrolyte to balance the charge.** (a) Cyclic voltammogram of Fc1N112-TFSI in DMF. In this test, 0.1 M TBAP and Ag/AgCl were used as the supporting electrolyte and the reference electrode, respectively. (b) Illustration of the redox reaction for Fc1N112-TFSI. This is also reported elsewhere.<sup>10</sup>

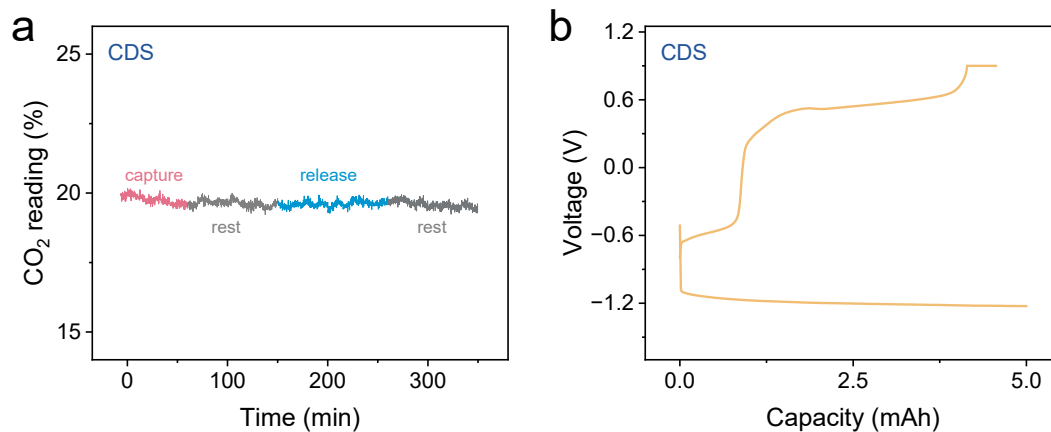

**Figure S14. Electrochemical CO<sub>2</sub> capture and release using CDS as the sorbent. (a)** CO<sub>2</sub> reading for one cycle using CDS. **(b)** The corresponding voltage-capacity curve. For CO<sub>2</sub> capture, the CDS was reduced at 5 mA for 60 min followed by 90 min rest. For CO<sub>2</sub> release, the adducts were oxidized at 5 mA to 0.9 V followed by 60 min constant voltage hold at 0.9 V, and then rested for another 90 min. The CO<sub>2</sub> reading curve did not show any change during discharge or charge process, which demonstrated again that the CDS with a stronger electron-withdrawing group could not capture CO<sub>2</sub>.

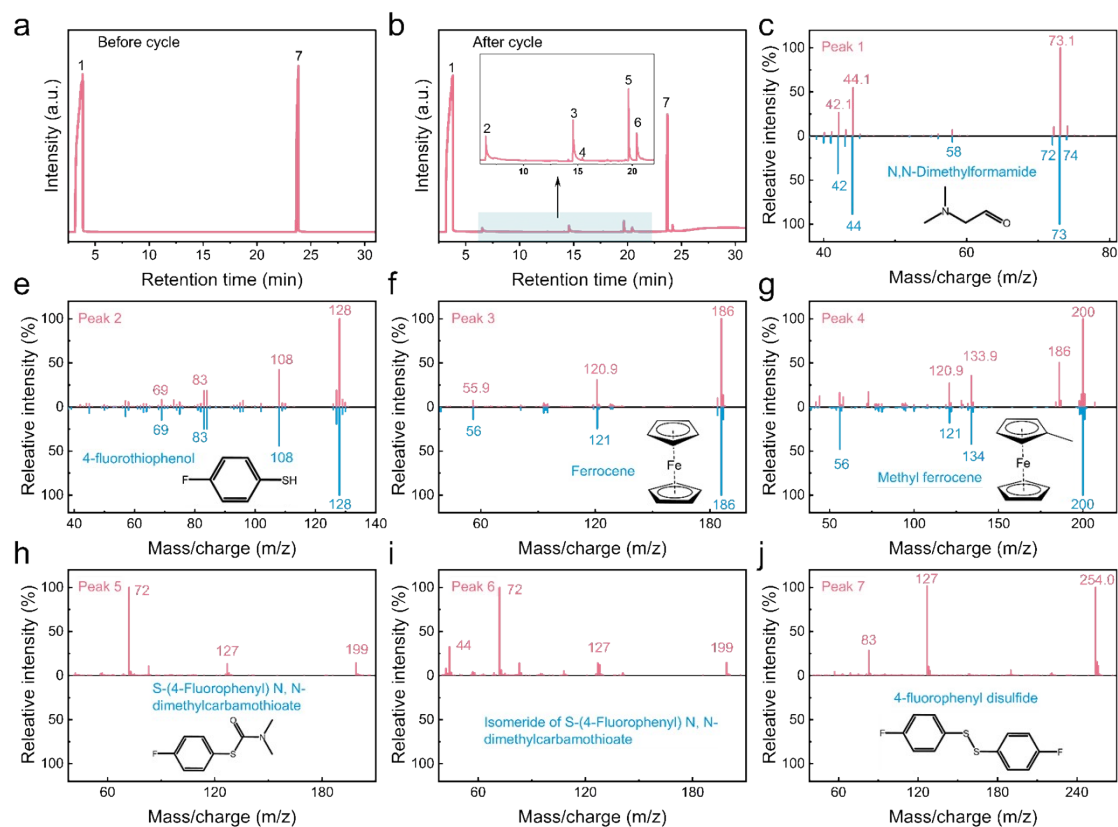

**Figure S15. Gas Chromatography-Mass Spectrometer (GC-MS) for the electrolyte of the FDS tank before and after cycling.** (a) and (b) are gas chromatograms for the electrolyte of the FDS tank before and after cycling, respectively. The appearance of ferrocene and its derivate after cycling indicated that the crossover phenomenon between the FDS and counter compartments. Moreover, some new peaks indicated the parasitic reaction could take place during the cycling experiment. (c), (d), (e), (f), (g), (h), (i) and (j) are standard (blue line) and experimental (red line) mass spectra for N, N-dimethylformamide, 4-fluorothiophenol, ferrocene, methyl ferrocene, S-(4-fluorophenyl) N, N-dimethylcarbamothioate, isomeride of S-(4-fluorophenyl) N, N-dimethylcarbamothioate (a tentative guess) and FDS, respectively, with the corresponding molecular structure at the bottom of the figure.

Note that (1) the standard mass spectra of S-(4-fluorophenyl) N, N-dimethylcarbamothioate and FDS are not included in the NIST mass spectral library; (2) the formation of a little amount of S-(4-fluorophenyl) N, N-dimethylcarbamothioate demonstrate the minor side reaction of  $\text{FS}^-$  with DMF; (3) the founding of Fc and it's derivates demonstrate the occurrence of crossover phenomenon.

**Table S8. Identification of GC-MS shown in Figure S15 for electrolyte of FDS tank.**

| Peaks | Retention time (min) | Identification                                                                  | Molecular weights |
|-------|----------------------|---------------------------------------------------------------------------------|-------------------|
| 1     | 3.800                | N, N-dimethylformamide                                                          | 73                |
| 2     | 6.532                | 4-fluorothiophenol                                                              | 128               |
| 3     | 14.566               | Ferrocene                                                                       | 186               |
| 4     | 15.425               | Methyl ferrocene                                                                | 200               |
| 5     | 19.666               | S-(4-fluorophenyl) N, N-dimethylcarbamothioate                                  | 199               |
| 6     | 20.423               | Isomeride of S-(4-fluorophenyl) N, N-dimethylcarbamothioate (a tentative guess) | 199               |
| 7     | 23.696               | 4-fluorophenyl disulfide                                                        | 254               |



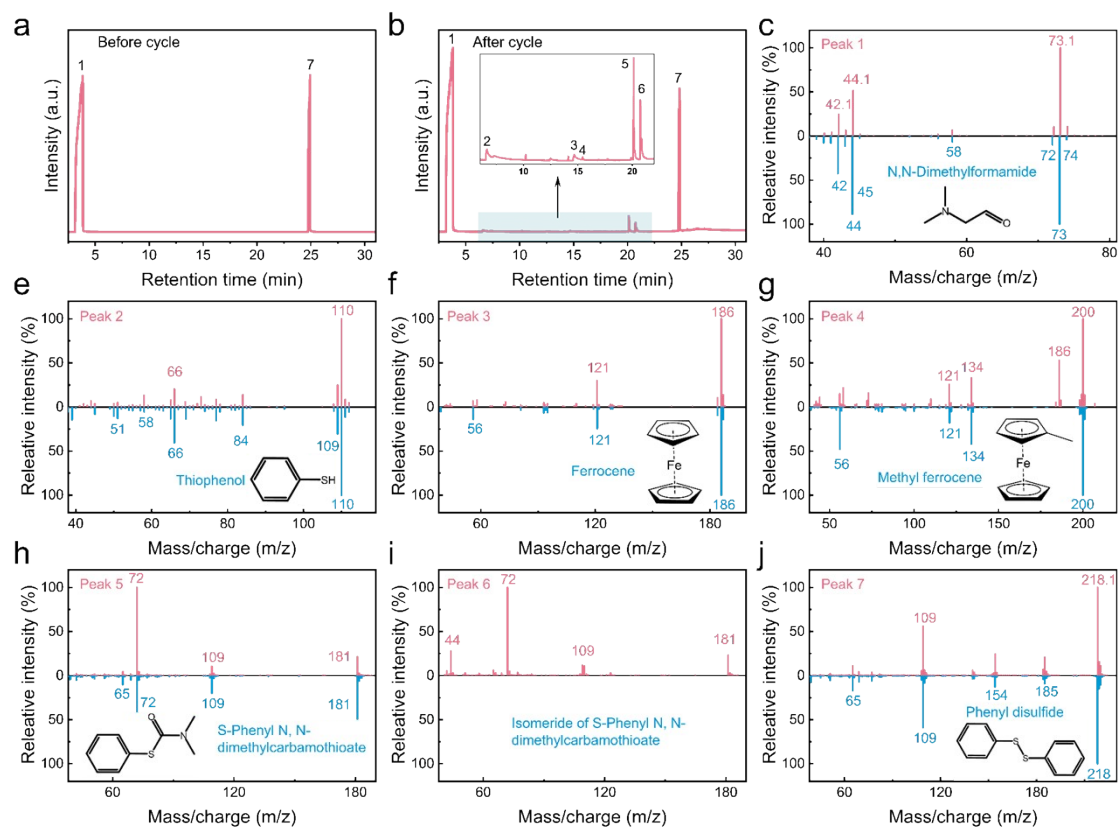

**Figure S16. Gas Chromatography-Mass Spectrometer (GC-MS) for the electrolyte of the PDS tank before and after cycling.**

(a) and (b) are gas chromatograms for the electrolyte of the PDS tank before and after cycling, respectively. The appearance of ferrocene and its derivatives after cycling indicated that the crossover phenomenon between the DS and counter chambers. Meanwhile, some new peaks indicated that parasitic reactions could occur during the cycling test. (c), (d), (e), (f), (g), (h), (i) and (j) are standard (blue line) and experimental (red line) mass spectra for N, N-dimethylformamide, thiophenol, ferrocene, methyl ferrocene, S-phenyl N, N-dimethylcarbamothioate, isomeride of S-phenyl N, N-dimethylcarbamothioate (a tentative guess) and PDS, respectively, with the corresponding molecular structures at the bottom of the figure.

Note that (1) the formation of a little amount of S-phenyl N, N-dimethylcarbamothioate demonstrates the existence of a minor side reaction of  $PS^-$  with DMF; (2) the finding of Fc and its derivatives demonstrate the occurrence of the crossover phenomenon.

**Table S9. Identification of GC-MS presented in Figure S16 for electrolyte of PDS tank.**

| Peaks | Retention time (min) | Identification                                                        | Molecular weights |
|-------|----------------------|-----------------------------------------------------------------------|-------------------|
| 1     | 4.062                | N, N-dimethylformamide                                                | 73                |
| 2     | 6.633                | Thiophenol                                                            | 110               |
| 3     | 14.672               | Ferrocene                                                             | 186               |
| 4     | 15.437               | Methyl ferrocene                                                      | 200               |
| 5     | 20.118               | S-phenyl N, N-dimethylcarbamothioate                                  | 181               |
| 6     | 20.744               | Isomeride of S-phenyl N, N-dimethylcarbamothioate (a tentative guess) | 181               |
| 7     | 24.82                | Phenyl disulfide                                                      | 218               |

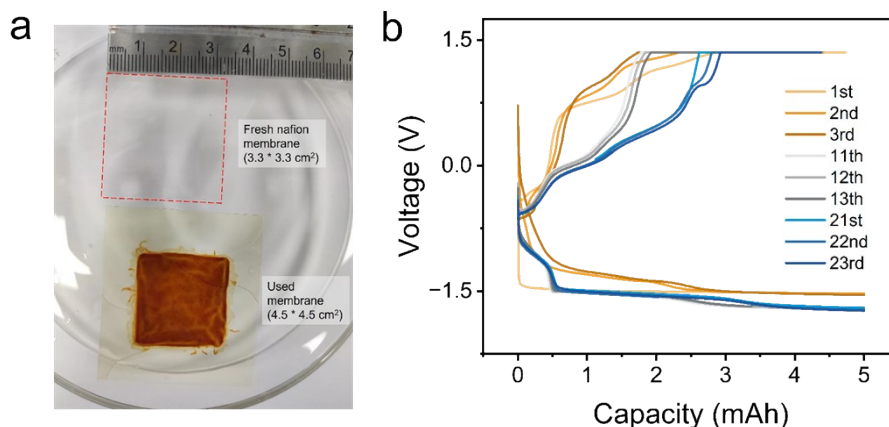

**Figure S17. (a)** A photograph showing a piece of fresh nafion membrane (3.3 \* 3.3 cm<sup>2</sup>) and a piece of used nafion membrane (4.5 \* 4.5 cm<sup>2</sup>). The expansion rate of the nafion membrane is about 186.0% after treatment, which could be the reason for crossover phenomenon of electrolytes. There were yellow substances absorbed on nafion membrane after use. The yellow substances might be the ferrocene derivatives absorbed on nafion membrane, and they could cause the increase of cell resistance during the cycling experiment. **(b)** The corresponding voltage-capacity curves of selected cycles. The applied voltage for constant current discharge (CCD) gradually increased after each cycle, which could be resulted from the increase of cell resistance, the crossover of electrolytes and the complicated parasitic reaction during cycling (**Figures S15 and S16**).

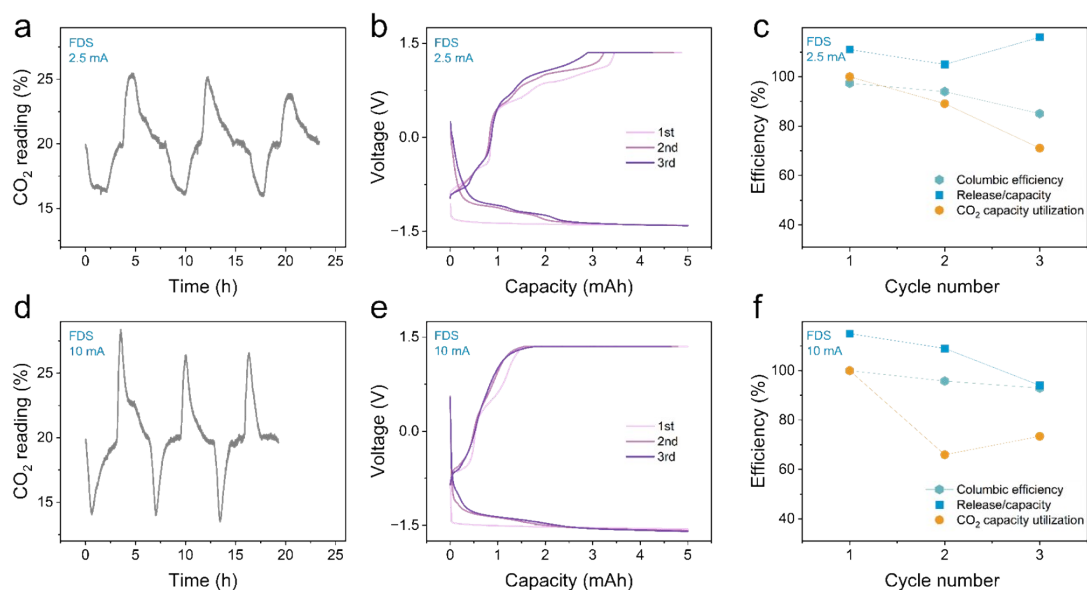

**Figure S18. Performance of CO<sub>2</sub> capture and release cycles in a flow cell with FDS under different constant current discharge (CCD).** (a) CO<sub>2</sub> readings curves at the gas outlet of FDS tank over 3 capture and release cycles at CCD of 2.5 mA. For capture (CCD) process, the FDS was reduced to react with CO<sub>2</sub> at 2.5 mA for 120 min and then rested for 90 min. For release (charge) process, CO<sub>2</sub> adducts (FSCO<sub>2</sub><sup>-</sup>) were oxidized to release CO<sub>2</sub> and regenerate FDS, at 5 mA to 1.35 V followed by a 100 min constant voltage of 1.35 V hold and an 80 min rest. (b) The voltage-capacity curves for capture-release cycles shown in (a). (c) Release/capture efficiency (blue square), CO<sub>2</sub> capacity utilization (yellow circle) and columbic efficiency (green hexagon) for 3 cycles shown in (a). (d) CO<sub>2</sub> readings curves at the gas outlet of FDS tank over 3 capture and release cycles at CCD of 10 mA. For capture (CCD) process, the FDS was reduced to react with CO<sub>2</sub> for 30 min and then rested for 150 min. For release (charge) process, CO<sub>2</sub> adducts (FSCO<sub>2</sub><sup>-</sup>) were oxidized to release CO<sub>2</sub> and regenerate FDS, at 10 mA to 1.35 V followed by a 105 min constant voltage of 1.35 V hold and a 90 min rest. (e) The voltage-capacity curves for capture-release cycles shown in (d). (f) Release/capture efficiency (blue square), CO<sub>2</sub> capacity utilization (yellow circle) and columbic efficiency (green hexagon) for 3 cycles shown in (d).

Note: the other experimental conditions are same as the **Figure 5** one in main text unless otherwise noted.

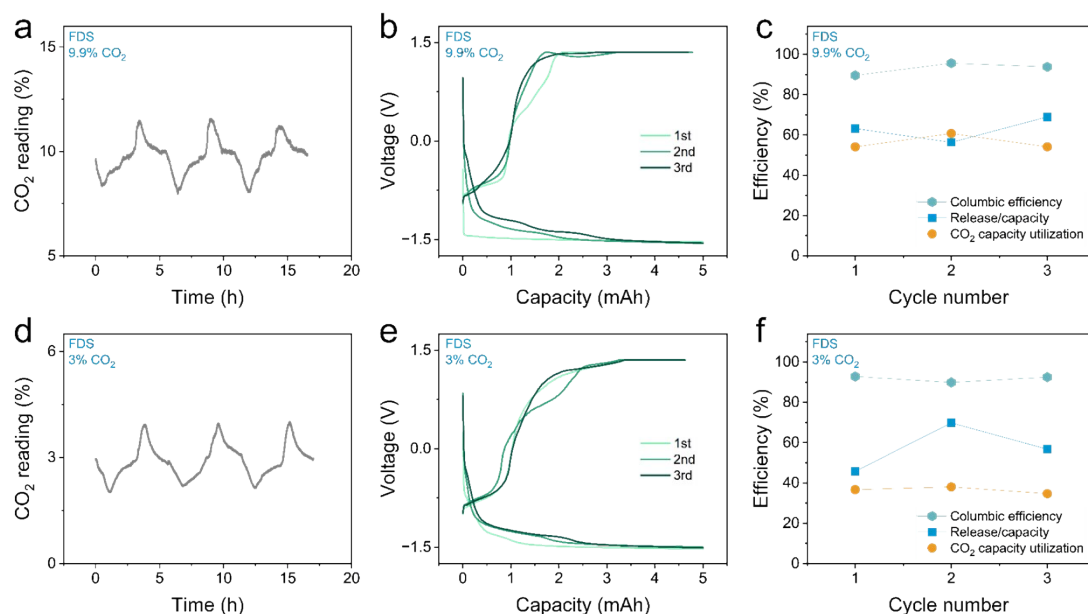

**Figure S19. Performance of CO<sub>2</sub> capture and release cycles in a flow cell with FDS under different CO<sub>2</sub> concentration.** **(a)** CO<sub>2</sub> readings curves at the gas outlet of FDS tank over 3 capture and release cycles under 9.9% CO<sub>2</sub>. For capture (CCD) process, the FDS was reduced to react with CO<sub>2</sub> at 5 mA for 60 min and then rested for 110 min. For release (charge) process, CO<sub>2</sub> adducts (FSCO<sub>2</sub><sup>-</sup>) were oxidized to release CO<sub>2</sub> and regenerate FDS, at 5 mA to 1.35 V followed by a 105 min constant voltage of 1.35 V hold and a 30 min rest. **(b)** The voltage-capacity curves for capture-release cycles shown in **(a)**. **(c)** Release/capture efficiency (blue square), CO<sub>2</sub> capacity utilization (yellow circle) and columbic efficiency (green hexagon) for 3 cycles shown in **(a)**. **(d)** CO<sub>2</sub> readings curves at the gas outlet of FDS tank over 3 capture and release cycles under 3.0% CO<sub>2</sub>. For capture (CCD) process, the FDS was reduced to react with CO<sub>2</sub> at 5 mA for 60 min and then rested for 120 min. For release (charge) process, CO<sub>2</sub> adducts (FSCO<sub>2</sub><sup>-</sup>) were oxidized to release CO<sub>2</sub> and regenerate FDS, at 5 mA to 1.35 V followed by an 80 min constant voltage of 1.35 V hold and a 40 min rest. **(e)** The voltage-capacity curves for capture-release cycles shown in **(d)**. **(f)** Release/capture efficiency (blue square), CO<sub>2</sub> capacity utilization (yellow circle) and columbic efficiency (green hexagon) for 3 cycles shown in **(d)**.

Note: the other experimental conditions are same as the **Figure 5** one in main text unless otherwise noted.

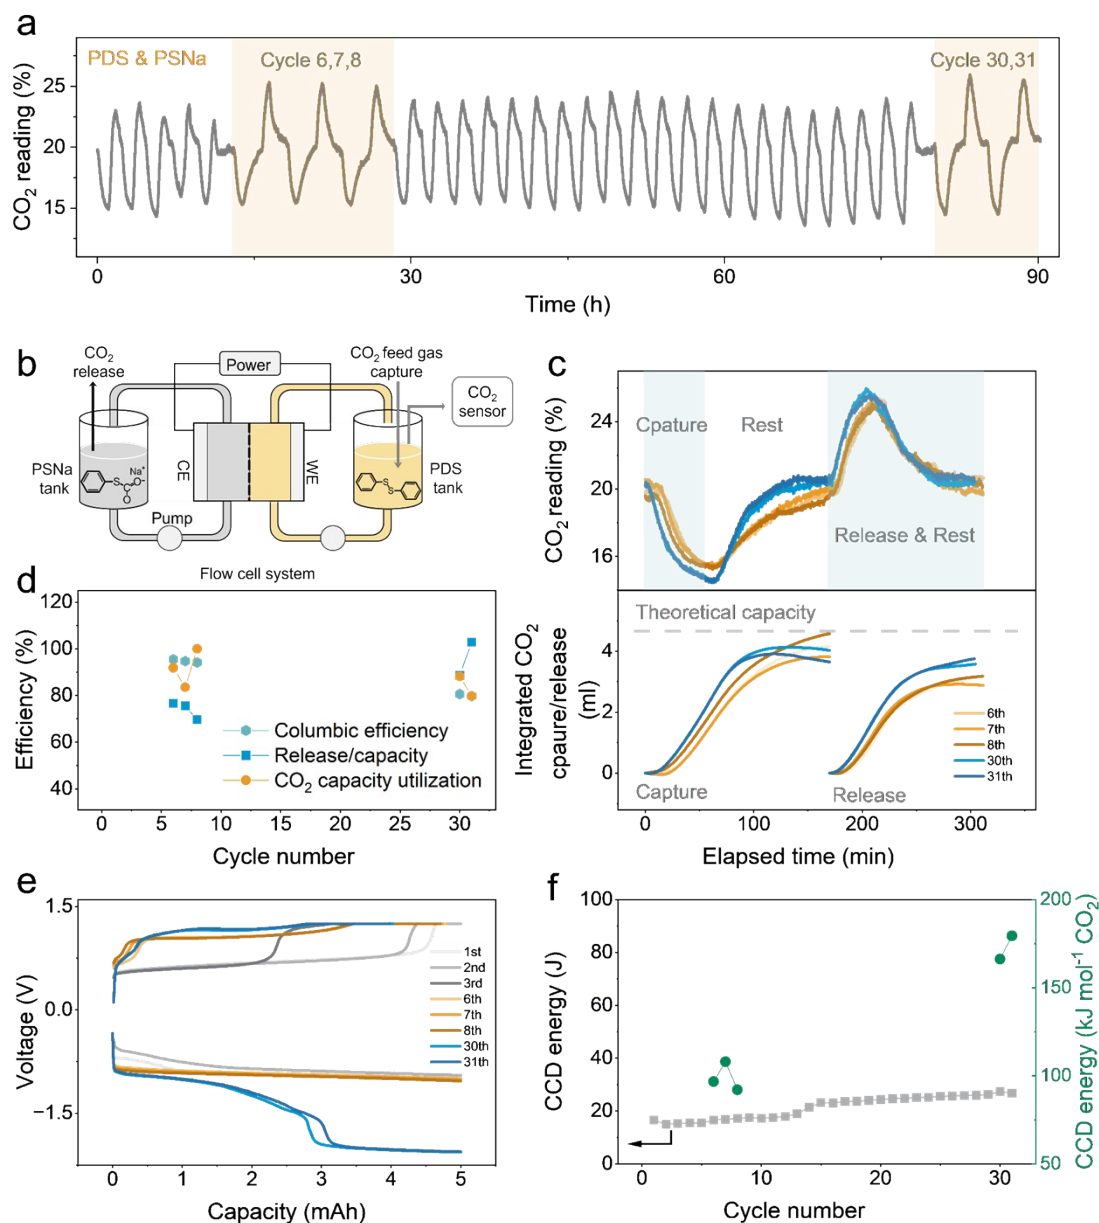

**Figure S20. Performance of CO<sub>2</sub> capture and release cycles in a flow cell with PDS and PSNa.**

(a) CO<sub>2</sub> readings at the gas outlet of PDS tank over 31 capture and release cycles for ~90 h of operation. Within these cycles, only 6<sup>th</sup>, 7<sup>th</sup>, 8<sup>th</sup>, 30<sup>th</sup> and 31<sup>st</sup> cycles include rest processes to calculate the amount of capture/release CO<sub>2</sub>.

(b) Schematic drawing of the CO<sub>2</sub> capture-release flow system. The PDS tank filled with PTFE beads was consecutively inputted with 20% CO<sub>2</sub> in N<sub>2</sub> at a flow rate of 2 standard cubic centimeters per minute (sccm), with a CO<sub>2</sub> sensor connected to the gas outlet. The PDS tank contained 5 ml DMF electrolyte with 0.2 M PDS and 0.5 M NaTFSI as the sorbent and supporting electrolyte, respectively. On the opposite side, the sodium phenyl thiolate (PSNa) tank was composed of 10 ml 0.1 M PSNa and 0.5 M NaTFSI. Since the PSNa tank was kept under CO<sub>2</sub> atmosphere, the PSNa will react with CO<sub>2</sub> generating sodium phenyl thiocarbonate (PSCO<sub>2</sub>Na). Both liquid electrolytes were flowed through the electrochemical cell (2 × 2 cm<sup>2</sup> electrode area) at a flow rate of 4 ml min<sup>-1</sup>. Carbon felts were used as the working electrode (WE) and counter electrode (CE).

(c) The upper one is overlays of selected capture and release cycles from (a) with the indication of capture and release steps by the shaded regions; the one below is the cumulative amount of captured and released CO<sub>2</sub> in selected cycles. For CCD process, the PDS was reduced to react with CO<sub>2</sub> at 5 mA for 60 min and then rested for 110 min. While on the opposite side, the PSCO<sub>2</sub>Na was oxidized to release CO<sub>2</sub> and reproduces PDS. For the charge process, CO<sub>2</sub> adducts (PSCO<sub>2</sub><sup>-</sup>) in PDS tank were oxidized to release CO<sub>2</sub> and regenerate PDS, at 5 mA to 1.35 V followed by a 40 min constant voltage of 1.35 V hold and a 60 min rest. In the PSNa tank, the PDS was reduced and then captured CO<sub>2</sub> forming PSCO<sub>2</sub>Na again.

(d) Release/capture efficiency (blue square), CO<sub>2</sub> capacity utilization (yellow circle) and Columbic efficiency (green hexagon) for the cycles with rest processes shown in (a).

(e) The voltage-capacity curves for selected capture-release cycles.

(f) The energy consumption of CCD processes through integrating the voltage-capacity curves. CCD energy (gray square) for all cycles, and CCD energy (green circle) for the cycles with rest process.

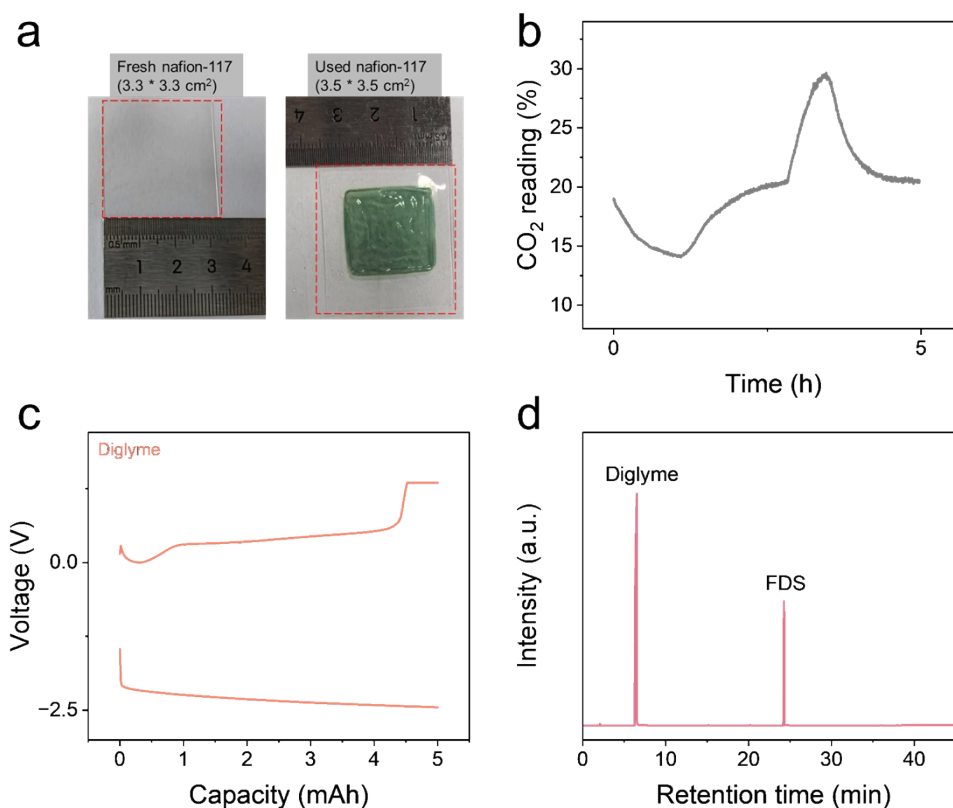

**Figure S21. Performance of CO<sub>2</sub> capture and release cycle in a flow cell with FDS by using diglyme as solvent.**

(a) photographs showing a piece of fresh nafion membrane (3.3 \* 3.3 cm<sup>2</sup>) and a piece of used nafion membrane (3.5 \* 3.5 cm<sup>2</sup>). The expansion rate of the nafion membrane is about 112.5% after treatment, which is much smaller than that of 186.0% in DMF solvent (**Figure S17**). The smaller expansion rate can help to alleviate the crossover of electrolyte. Thus, in this experiment one membrane was used. There were green substances absorbed on nafion membrane after use. The green substances might be the ferrocene derivatives absorbed on nafion membrane, and they could cause the increase of cell resistance during the cycling experiment.

(b) CO<sub>2</sub> readings at the gas outlet of FDS tank for one capture and release cycle. For capture (discharge) process, the FDS was reduced to react with CO<sub>2</sub> at 5 mA for 60 min and then rested for 110 min. For release (charge) process, CO<sub>2</sub> adducts (FSCO<sub>2</sub><sup>-</sup>) were oxidized to release CO<sub>2</sub> and regenerate FDS, at 5 mA to 1.35 V followed by a 25 min constant voltage of 1.35 V hold and a 50 min rest.

(c) The voltage-capacity curve for CO<sub>2</sub> capture-release cycle shown in (b). The applied voltage was larger than that when using DMF as solvent. That means the ionic conductivity of membrane decrease when using diglyme as solvent, which leads to higher energy consumption.

(d) GC-MS spectra of electrolyte in FDS tank after cyclic experiment. The MS peaks of diglyme and FDS are obvious, and ferrocene derivatives may be too less to be detected. That indicates that the membrane with smaller expansion rate is beneficial to alleviating the crossover problem. Meanwhile, there is not any side product was found, which means that the side reaction between thiolate anion and solvent can be avoided by choosing suitable solvent.

Note: the other experimental conditions are same as the **Figure 5** one in main text unless otherwise specified.

**Table S10. Summary of selected redox-active molecules for electrochemical CO<sub>2</sub> capture and release.**

| Molecule | Estimated theoretical energy consumption (kJ/mol CO <sub>2</sub> )                                                                                                                                                                                                                                                                                                                                                                                                                                                                                                                                                   | Demonstrated energy consumption (kJ/mol CO <sub>2</sub> ) | Demonstrated system/device                 | Description/advantage                                                                                                                                              | Ref. |
|----------|----------------------------------------------------------------------------------------------------------------------------------------------------------------------------------------------------------------------------------------------------------------------------------------------------------------------------------------------------------------------------------------------------------------------------------------------------------------------------------------------------------------------------------------------------------------------------------------------------------------------|-----------------------------------------------------------|--------------------------------------------|--------------------------------------------------------------------------------------------------------------------------------------------------------------------|------|
| 1,8-ESP  | —                                                                                                                                                                                                                                                                                                                                                                                                                                                                                                                                                                                                                    | 36-55                                                     | Flow system with flow cell                 | high capture capacity of 0.86-1.41 mol L <sup>-1</sup> and an extremely low degradation rate of <0.01% per day                                                     | 11   |
|          | Mechanism: <p>The mechanism for 1,8-ESP is shown in two parts. On the left, the 'Charge' cycle involves the oxidation of 1,8-ESP (a redox-active molecule with two sulfonic acid groups) to its radical cation (+2 e<sup>-</sup>), which then reacts with CO<sub>2</sub> to form a carbonate species (HCO<sub>3</sub><sup>-</sup> / CO<sub>3</sub><sup>2-</sup>) and H<sub>2</sub>O. On the right, the 'Discharge' cycle involves the reduction of the carbonate species back to CO<sub>2</sub> and OH<sup>-</sup>, while the radical cation of 1,8-ESP is regenerated to its original state (-2 e<sup>-</sup>).</p> |                                                           |                                            |                                                                                                                                                                    |      |
| AQ       | —                                                                                                                                                                                                                                                                                                                                                                                                                                                                                                                                                                                                                    | 254-830                                                   | Custom-made gas cell                       | Heterogeneous CO <sub>2</sub> capture with AQ solid electrode. Perform under pure CO <sub>2</sub> at 0.1 A g <sup>-1</sup> .                                       | 12   |
| PAQ      | ~34<br>(Ionic liquid of [Bmim][TF <sub>2</sub> N])                                                                                                                                                                                                                                                                                                                                                                                                                                                                                                                                                                   | ~40-90                                                    | Parallel passage electrochemical cell      | Heterogeneous CO <sub>2</sub> capture with PAQ solid electrode. Performed under 10% CO <sub>2</sub> at ionic liquid electrolyte with faradic efficiency of 60%-90% | 13   |
| TCQ      | 21.2-34.7<br>(0.2 M TBAPF <sub>6</sub> in DMF solutions)                                                                                                                                                                                                                                                                                                                                                                                                                                                                                                                                                             | —                                                         | H-Cell with glass frit                     | Performed under 10% CO <sub>2</sub> with ethanol as additive. Light sensitivity for TCQ.                                                                           | 14   |
| LQ       | —                                                                                                                                                                                                                                                                                                                                                                                                                                                                                                                                                                                                                    | 35-220                                                    | Continuous flow system with two flow cells | 0.1 MPa pure CO <sub>2</sub> capture and release at current of 0.4-1.4 mA cm <sup>-2</sup>                                                                         | 2    |
|          | Mechanism: <p>The mechanism for LQ shows a redox cycle of a quinone derivative. In the top half, the quinone is reduced to its semiquinone radical anion (+e<sup>-</sup>) and then to its fully reduced hydroquinone form (+e<sup>-</sup>), which captures CO<sub>2</sub>. In the bottom half, the hydroquinone is oxidized back to the semiquinone (-e<sup>-</sup>) and then to the quinone (-e<sup>-</sup>), releasing CO<sub>2</sub>.</p>                                                                                                                                                                         |                                                           |                                            |                                                                                                                                                                    |      |



|             |                                                       |                                                                                     |                            |                                                                                                                                                    |           |
|-------------|-------------------------------------------------------|-------------------------------------------------------------------------------------|----------------------------|----------------------------------------------------------------------------------------------------------------------------------------------------|-----------|
| <b>AzPy</b> | ~16<br>(0.1 M TBAPF <sub>6</sub> in DMSO electrolyte) | 120                                                                                 | Flow system with flow cell | Performed under 18.5% CO <sub>2</sub> + 3% O <sub>2</sub> at 2 mA cm <sup>-2</sup> .<br>Only considering energy for CO <sub>2</sub> capture        | 3         |
|             |                                                       | 156                                                                                 |                            | Performed under 18.5% CO <sub>2</sub> + 5% O <sub>2</sub> at 2 mA cm <sup>-2</sup> .<br>Only considering energy for CO <sub>2</sub> capture        |           |
| Mechanism:  |                                                       |                                                                                     |                            |                                                                                                                                                    |           |
|             |                                                       | 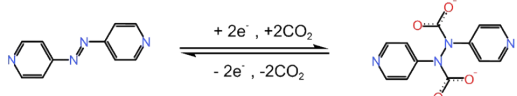  |                            |                                                                                                                                                    |           |
| <b>BDS</b>  | ~200<br>(Ionic liquid of BMP TFSI)                    | —                                                                                   | H-Cell with glass frit     | Performed under 300 ppm CO <sub>2</sub> in N <sub>2</sub> in DMF solution                                                                          | 4         |
| <b>PDS</b>  | 141<br>(0.1 M TBAP in DMF electrolyte)                | 146 (first cycle)<br>183.7 (average of 19 cycles)                                   | Flow system with flow cell | Performed under 20% CO <sub>2</sub> at 1.25 mA cm <sup>-2</sup> . (Only considering energy for CO <sub>2</sub> capture)                            | This work |
|             |                                                       | 128 (average of 5 cycles within 31 cycles)                                          |                            | Use CO <sub>2</sub> adduct as counter electrolyte. Achieve CO <sub>2</sub> capture and release with a single energy input.                         |           |
| <b>FDS</b>  | 133<br>(0.1 M TBAP in DMF electrolyte)                | 153 (First cycle)<br>200 (average of 25 cycle)                                      | Flow system with flow cell | Perform under 20% CO <sub>2</sub> at 1.25 mA cm <sup>-2</sup> . (Only considering energy for CO <sub>2</sub> capture)                              |           |
|             |                                                       | 161 (First cycle)<br>212 (average of 11 cycle)                                      |                            | Perform under 20% CO <sub>2</sub> with 0.1 M H <sub>2</sub> O at 1.25 mA cm <sup>-2</sup> . (Only considering energy for CO <sub>2</sub> capture). |           |
| Mechanism:  |                                                       |                                                                                     |                            |                                                                                                                                                    |           |
|             |                                                       |  |                            |                                                                                                                                                    |           |

Abbreviations of molecule in Table S10 are listed below: **1,8-ESP**: 2,2'-(phenazine-1,8-diyl)bis(ethane-1-sulfonate); **AQ**: anthraquinone; **PAQ**: polyanthraquinone; **[Bmim][TF<sub>2</sub>N]**: 1-butyl-3-methylimidazolium bis(trifluoromethylsulfonyl)imide **TCQ**: 2,3,5,6-tetrachloro-p-benzoquinone (TCQ); **LQ**: 2,3-Di-(2-(2-methoxyethoxy)ethoxy)-1,4-naphthoquinone **AzPy**: azopyridine; **BDS**: benzyl disulfide; **MP TFSI**: 1-butyl-1-methylpyrrolidinium bis(trifluoromethylsulfonyl)imide **PDS**: phenyl disulfide; **FDS**: 4-fluorophenyl disulfides.

## Supplementary Note 1 | potential organodisulfide candidates

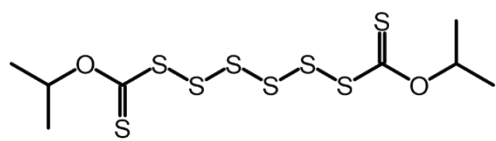

Diisopropyl xanthogen polysulfide (DIXPS)

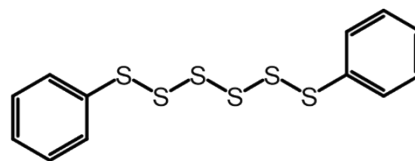

Phenyl hexasulfide (PHS)

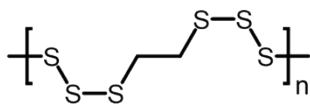

Polyethylene hexasulfide (PEHS)

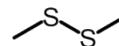

Dimethyl disulfide (DMDS)

The above show some representative organodisulfides for lithium-sulfur battery. Diisopropyl xanthogen polysulfide (DIXPS) and Phenyl hexasulfide (PHS) are symmetric organopolysulfides.<sup>15, 16</sup> They could have better electrochemical performance due to their longer sulfur chain, which leads to higher electrochemical activity. However, the insoluble  $\text{Li}_2\text{S}$  is generated during their discharge process. Polyethylene hexasulfide (PEHS) can be used as a solid electrode for heterogeneous  $\text{CO}_2$  capture,<sup>17</sup> but it also faces the problem of generating insoluble  $\text{Li}_2\text{S}$ . Dimethyl disulfide (DMDS) with simple structure makes the investigation of its  $\text{CO}_2$  capture and release mechanism easy,<sup>18</sup> but its redox performance is difficult to be tuned via molecular engineering due to its simple structure.

## Supplementary Note 2 | DFT calculations

The binding energy was obtained from the change of the enthalpy for the binding of thiolate ( $\text{RS}^-$ ) to  $\text{CO}_2$ , as the equation below:

$$\Delta H = H_{\text{RSCO}_2^-} - (H_{\text{RS}^-} + H_{\text{CO}_2}) \quad (\text{S1})$$

Where,  $\Delta H$  is binding energy.  $H_{\text{RSCO}_2^-}$ ,  $H_{\text{RS}^-}$  and  $H_{\text{CO}_2}$  are the enthalpy of thiocarbonate ( $\text{RSCO}_2^-$ ),  $\text{RS}^-$ , and  $\text{CO}_2$ , respectively.

The standard redox potentials of different disulfides were calculated by the difference of Gibbs free energies. The equations are as followed:

$$\Delta G = G_{\text{red}} - G_{\text{ox}} \quad (\text{S2})$$

$$E^0 = \Delta G / -e \quad (\text{S3})$$

Where,  $G_{\text{red}}$  and  $G_{\text{ox}}$  is the reduction and oxidation state species, respectively.  $\Delta G$  is the difference between  $G_{\text{red}}$  and  $G_{\text{ox}}$ .  $E^0$  is the standard redox potential.

### Supplementary Note 3 | calculation of $\text{CO}_2$ binding constant ( $K_b$ )

Using the data obtained from cyclic voltammetry is a simple way to calculate  $K_b$  of redox active molecule. Specifically, the value of  $K_b$  can be determined by the shift in half wave potential as a function of the concentration of  $\text{CO}_2$  ( $[\text{CO}_2]$ , mol  $\text{L}^{-1}$ ).<sup>19, 20</sup>  $K_b$  is the inverse of the dissociation constant. The bigger the  $K_b$  value, the greater the binding affinity to  $\text{CO}_2$ .

If  $K_b > 100$ , the Eqn. S4 derived from the Nernst equation should be used as below.

$$E_{1/2}(\text{CO}_2) = E_{1/2}(a) + \frac{RT}{nF} \ln(K_b) + q \frac{RT}{nF} \ln \frac{[\text{CO}_2]}{[\text{C}_0]} \quad (\text{S4})$$

where  $E_{1/2}(\text{CO}_2)$  and  $E_{1/2}(a)$  are the half wave potential of redox active sorbent in the presence and absence of  $\text{CO}_2$ , respectively.  $q$  is the number of  $\text{CO}_2$  that binds to generated nucleophile,  $\text{C}_0$  is the standard concentration (mol  $\text{L}^{-1}$ ).

If the  $1 \ll K_b < 100$ , the Eqn. S4 should not be used, and the derived Eqn. S5 should be used as follows:

$$E_{1/2}(\text{CO}_2) = E_{1/2}(a) + \frac{RT}{nF} \ln \left( K_b \frac{[\text{CO}_2]}{[\text{C}_0]} + 1 \right) \quad (\text{S5})$$

$$E_{1/2}(\text{CO}_2) - E_{1/2}(a) = \Delta E_{pa} \quad (\text{S6})$$

The reduction peak potential of  $\text{RS}^{\bullet}$  to  $\text{RS}^-$  can not be observed due to the intrinsic property of RSSR. Therefore, we estimated the  $E_{1/2}$  by  $E_{pa}$  minus 30 mV.<sup>14, 21</sup> As shown in Eqn.(S6), the peak shift of  $E_{1/2}$  ( $E_{1/2}(\text{CO}_2) - E_{1/2}(a)$ ) can be estimated by  $\Delta E_{pa}$  (**Table 1**). The  $\text{CO}_2$  concentration in DMF at 25 °C is 0.199 M under 0.1 MPa pressure and the Henry's constant ( $H_c$ ) is 5.001  $\text{M}^{-1} \text{atm}$ .<sup>22</sup>

In order to verify whether the above method can be used to calculated the  $K_b$  of thiolate anions, we investigated the linear correlation between  $E_{1/2}$  and  $\text{CO}_2$  concentration. The

$E_{1/2}$  were estimated by  $E_{pa}$  minus 30 mV, and the  $E_{pa}$  were obtained from CV data of PDS under different  $CO_2$  partial pressures (different  $CO_2$  concentration), as shown in the **Figure S22** below. The linear plot of  $E_{1/2}$  vs.  $[CO_2]$  shows a good linear correlation between  $E_{1/2}$  and  $CO_2$  concentration with a  $R^2$  of 0.9655, which demonstrates that the above method can be used to estimate the  $K_b$  of thiolate anions.

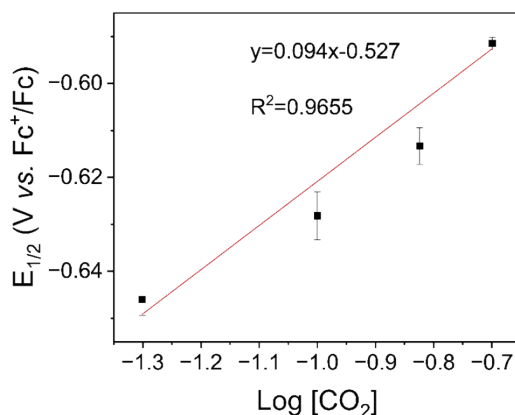

**Figure S22. Linear plot of  $E_{1/2}$  vs  $[CO_2]$  for PDS.** The  $[CO_2]$  were calculated by Henry's law from different  $CO_2$  partial pressure (25%, 50%, 75% and 100% atm.). The  $E_{1/2}$  were estimated by  $E_{pa}$  minus 30 mV. The  $E_{pa}$  were obtained from CV measurement of PDS under DMF with 0.1 M TBAP.

#### Supplementary Note 4 | details of chemicals

4-fluorophenyl disulfide (FDS, 98%) was purchased from Thermo Fisher Scientific. Phenyl disulfide (PDS, 98%), Benzyl disulfide (BDS, 98%), Lithium bis(trifluoromethylsulfonylethyl)imide (LiTFSI, 99.5%) were obtained from Meryer. 4-aminodiphenyl disulfide (ADS, 98%+), 2,2'-dipyridinyl disulfide (2-PyDS, 98%+), 4,4'-dipyridinyl disulfide (4-PyDS, 98%), Sodium bis(trifluoromethylsulfonylethyl)imide (NaTFSI, 98%+) and Tetrabutylammonium Perchlorate (TBAP, 99%+) were purchased from Adamas-beta. N, N-Dimethylformamide (99.9%,  $H_2O \leq 30$  ppm), Dimethyl sulfoxide (99.9%,  $H_2O \leq 50$  ppm) Innochem and 4-[(4-cyanophenyl)disulfanyl] benzonitrile (CDS, 99) were obtained from Innochem. Ferrocene (Fc, 99%) was obtained from D-chem. 4-nitrophenyl disulfide (NDS, 98%) and 4-methylphenyl disulfide (MDS, 98%) were purchased from Crgent Biotech and Energy Chemical, respectively. 4-Methoxyphenyl

disulfide (ODS, 98%) was obtained from Adamas-beta.

## References

- (1) Gurkan, B.; Simeon, F.; Hatton, T. A. Quinone Reduction in Ionic Liquids for Electrochemical CO<sub>2</sub> Separation. *ACS Sustainable Chemistry & Engineering* **2015**, *3* (7), 1394-1405. DOI: 10.1021/acssuschemeng.5b00116.
- (2) Diederichsen, K. M.; Liu, Y.; Ozbek, N.; Seo, H.; Hatton, T. A. Toward solvent-free continuous-flow electrochemically mediated carbon capture with high-concentration liquid quinone chemistry. *Joule* **2022**, *6* (1), 221-239. DOI: 10.1016/j.joule.2021.12.001.
- (3) Li, X.; Zhao, X.; Liu, Y.; Hatton, T. A.; Liu, Y. Redox-tunable Lewis bases for electrochemical carbon dioxide capture. *Nature Energy* **2022**, *7* (11), 1065-1075. DOI: 10.1038/s41560-022-01137-z.
- (4) Singh, P.; Rheinhardt, J. H.; Olson, J. Z.; Tarakeshwar, P.; Mujica, V.; Buttry, D. A. Electrochemical Capture and Release of Carbon Dioxide Using a Disulfide-Thiocarbonate Redox Cycle. *J Am Chem Soc* **2017**, *139* (3), 1033-1036. DOI: 10.1021/jacs.6b10806.
- (5) Paparo, A.; Okuda, J. Carbon dioxide complexes: Bonding modes and synthetic methods. *Coordination Chemistry Reviews* **2017**, *334*, 136-149. DOI: 10.1016/j.ccr.2016.06.005.
- (6) Vasudevan, D.; Wendt, H. Electroreduction of oxygen in aprotic media. *Journal of Electroanalytical Chemistry* **1995**, *392* (1-2), 69-74. DOI: 10.1016/0022-0728(95)04044-O.
- (7) Ding, Y.; Chen, Y. P.; Zhang, X.; Chen, L.; Dong, Z.; Jiang, H. L.; Xu, H.; Zhou, H. C. Controlled Intercalation and Chemical Exfoliation of Layered Metal-Organic Frameworks Using a Chemically Labile Intercalating Agent. *J Am Chem Soc* **2017**, *139* (27), 9136-9139. DOI: 10.1021/jacs.7b04829.
- (8) Shen, L.; Qian, Y.; Lyu, Z.; Kim, D.-H.; Kang, D. J. Two-Dimensional Metal-Organic Frameworks and Their Derivative Electrocatalysts for Water Splitting. *Applied Sciences* **2023**, *13* (16). DOI: 10.3390/app13169343.
- (9) Stueber, D.; Patterson, D.; Mayne, C. L.; Orendt, A. M.; Grant, D. M.; Parry, R. W. Carbonates, Thiocarbonates, and the Corresponding Monoalkyl Derivatives. 1. Their Preparation and Isotropic <sup>13</sup>C NMR Chemical Shifts. *Inorganic Chemistry* **2001**, *40* (8), 1902-1911. DOI: 10.1021/ic0012266.
- (10) Wei, X.; Cosimbescu, L.; Xu, W.; Hu, J. Z.; Vijayakumar, M.; Feng, J.; Hu, M. Y.; Deng, X.; Xiao, J.; Liu, J.; et al. Towards High-Performance Nonaqueous Redox Flow Electrolyte Via Ionic Modification of Active Species. *Advanced Energy Materials* **2014**, *5* (1). DOI: 10.1002/aenm.201400678.
- (11) Pang, S.; Jin, S.; Yang, F.; Alberts, M.; Li, L.; Xi, D.; Gordon, R. G.; Wang, P.; Aziz, M. J.; Ji, Y. A phenazine-based high-capacity and high-stability electrochemical CO<sub>2</sub> capture cell with coupled electricity storage. *Nature Energy* **2023**, *8* (10), 1126-1136. DOI: 10.1038/s41560-023-01347-z.
- (12) Hartley, N. A.; Pugh, S. M.; Xu, Z.; Leong, D. C. Y.; Jaffe, A.; Forse, A. C. Quinone-functionalised carbons as new materials for electrochemical carbon dioxide capture. *Journal of Materials Chemistry A* **2023**, *11* (30), 16221-16232. DOI: 10.1039/d3ta02213g.
- (13) Voskian, S.; Hatton, T. A. Faradaic electro-swing reactive adsorption for CO<sub>2</sub> capture. *Energy & Environmental Science* **2019**, *12* (12), 3530-3547. DOI: 10.1039/c9ee02412c.
- (14) Barlow, J. M.; Yang, J. Y. Oxygen-Stable Electrochemical CO<sub>2</sub> Capture and Concentration with Quinones Using Alcohol Additives. *J Am Chem Soc* **2022**, *144* (31), 14161-14169. DOI: 10.1021/jacs.2c04044.
- (15) Bhargav, A.; Bell, M. E.; Karty, J.; Cui, Y.; Fu, Y. A Class of Organopolysulfides As Liquid Cathode Materials for High-Energy-Density Lithium Batteries. *ACS Applied Materials & Interfaces* **2018**, *10*

- (25), 21084-21090. DOI: 10.1021/acsami.8b06803.
- (16) Bhargav, A.; Manthiram, A. Xanthogen Polysulfides as a New Class of Electrode Material for Rechargeable Batteries. *Advanced Energy Materials* **2020**, *10* (37). DOI: 10.1002/aenm.202001658.
- (17) Bhargav, A.; Chang, C.-H.; Fu, Y.; Manthiram, A. Rationally Designed High-Sulfur-Content Polymeric Cathode Material for Lithium–Sulfur Batteries. *ACS Applied Materials & Interfaces* **2019**, *11* (6), 6136-6142. DOI: 10.1021/acsami.8b21395.
- (18) Chen, S.; Dai, F.; Gordin, M. L.; Yu, Z.; Gao, Y.; Song, J.; Wang, D. Functional Organosulfide Electrolyte Promotes an Alternate Reaction Pathway to Achieve High Performance in Lithium–Sulfur Batteries. *Angewandte Chemie International Edition* **2016**, *55* (13), 4231-4235. DOI: 10.1002/anie.201511830.
- (19) Seo, H. Molecular redox-active organic materials for electrochemical carbon capture. *MRS Communications* **2023**, *13* (6), 994-1008. DOI: 10.1557/s43579-023-00454-y.
- (20) Schmidt, M. H.; Miskelly, G. M.; Lewis, N. S. Effects of redox potential, steric configuration, solvent, and alkali metal cations on the binding of carbon dioxide to cobalt(I) and nickel(I) macrocycles. *Journal of the American Chemical Society* **1990**, *112* (9), 3420–3426. DOI: 10.1021/ja00165a027.
- (21) Elgrishi, N.; Rountree, K. J.; McCarthy, B. D.; Rountree, E. S.; Eisenhart, T. T.; Dempsey, J. L. A Practical Beginner's Guide to Cyclic Voltammetry. *Journal of Chemical Education* **2017**, *95* (2), 197-206. DOI: 10.1021/acs.jchemed.7b00361.
- (22) Gennaro, A.; Isse, A. A.; Vianello, E. Solubility and electrochemical determination of CO<sub>2</sub> in some dipolar aprotic solvents. *Journal of Electroanalytical Chemistry and Interfacial Electrochemistry* **1990**, *289* (1-2), 203-215. DOI: 10.1016/0022-0728(90)87217-8.
